# Supplementary material for: Repurposing of Diagnostic Whole Exome Sequencing Data of 1,583 Individuals for Clinical Pharmacogenetics
Source: PubMed Central journal article supplement — Clin Pharmacol Ther. 2019 Nov 21;107(3):617–27. doi: 10.1002/cpt.1665 (PMC7027978; doi:10.1002/cpt.1665), 2019-11-21
Supplement: CPT-107-617-s001.pdf [file CPT-107-617-s001.pdf]

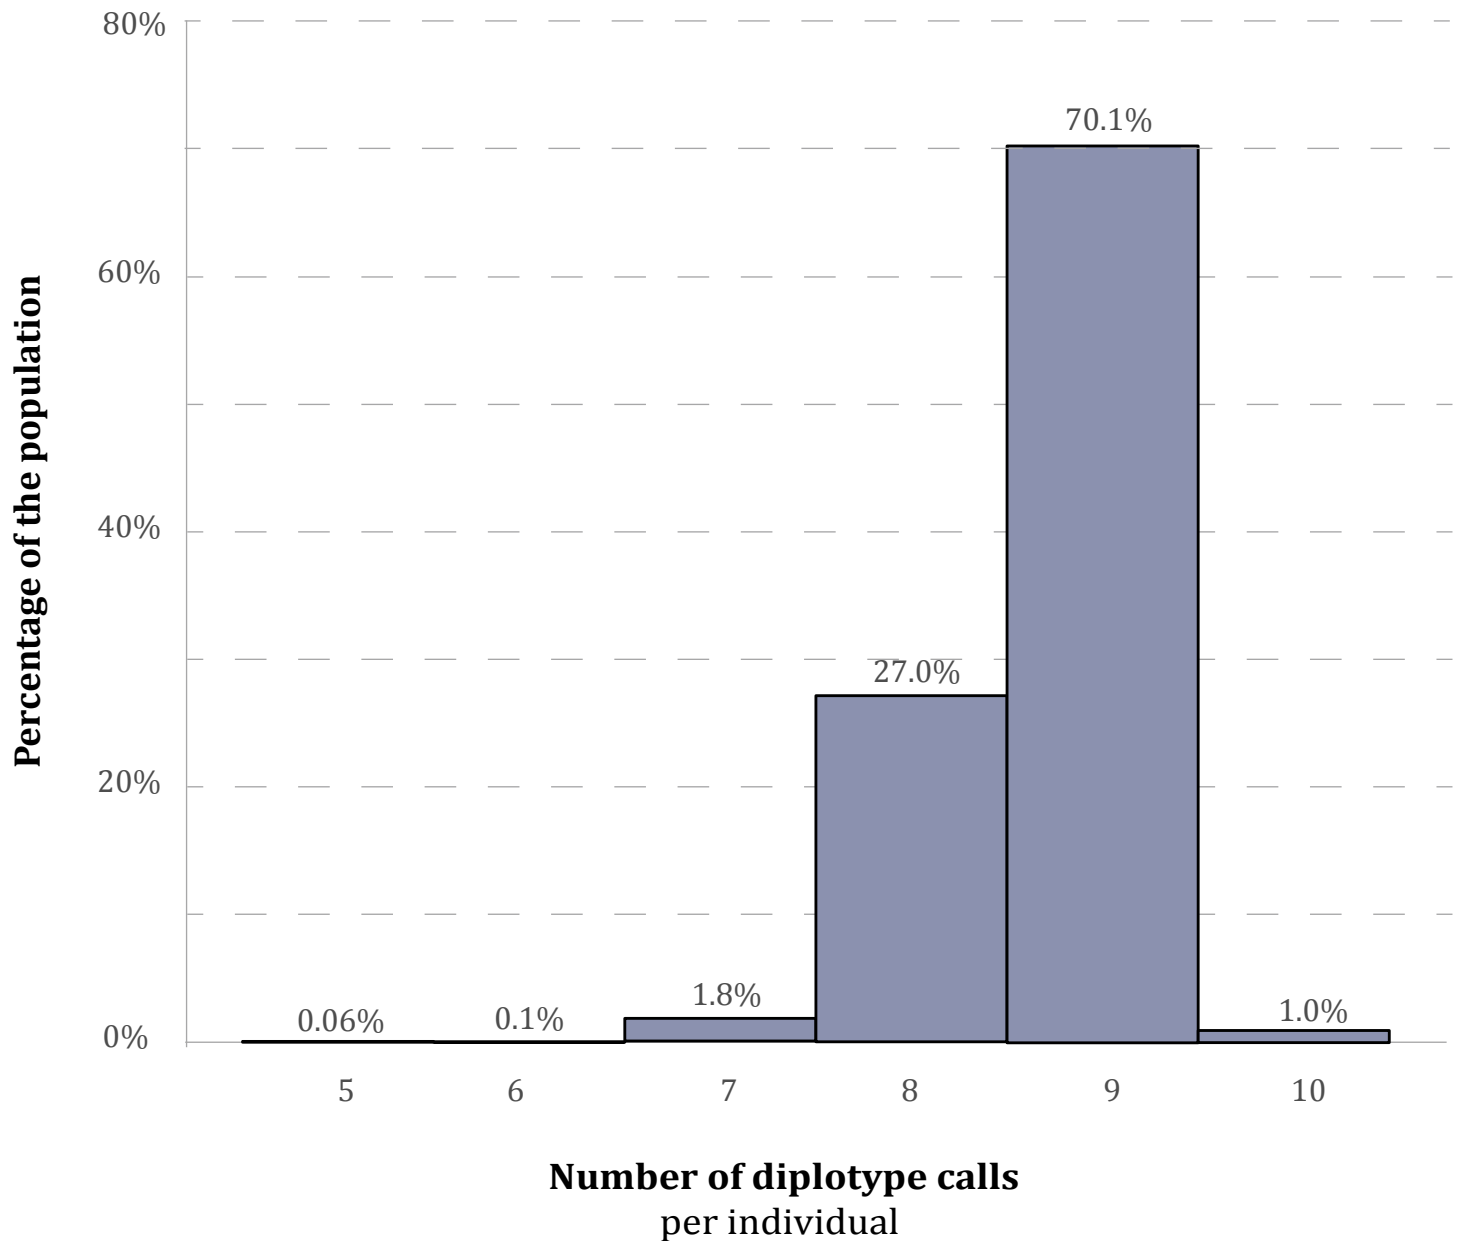

**Figure S1: Number of diplotype calls based on SNV data per individual.** 11 genes were screened in 1,583 individuals, when there was a lack of coverage for at least one variant a diplotype was not assigned. Copy Number Variants could not be determined and are not included in the diplotype assignment. The majority of individuals had diplotype data for 9 out of 11 genes. No genotype calls for *UGT1A1* were available, only 1% of the diplotypes for *CYP2C19* could be called.
