# Supplementary material for: Repurposing of Diagnostic Whole Exome Sequencing Data of 1,583 Individuals for Clinical Pharmacogenetics
Source: PubMed Central journal article supplement — Clin Pharmacol Ther. 2019 Nov 21;107(3):617–27. doi: 10.1002/cpt.1665 (PMC7027978; doi:10.1002/cpt.1665), 2019-11-21
Supplement: CPT-107-617-s003.pdf [file CPT-107-617-s003.pdf]

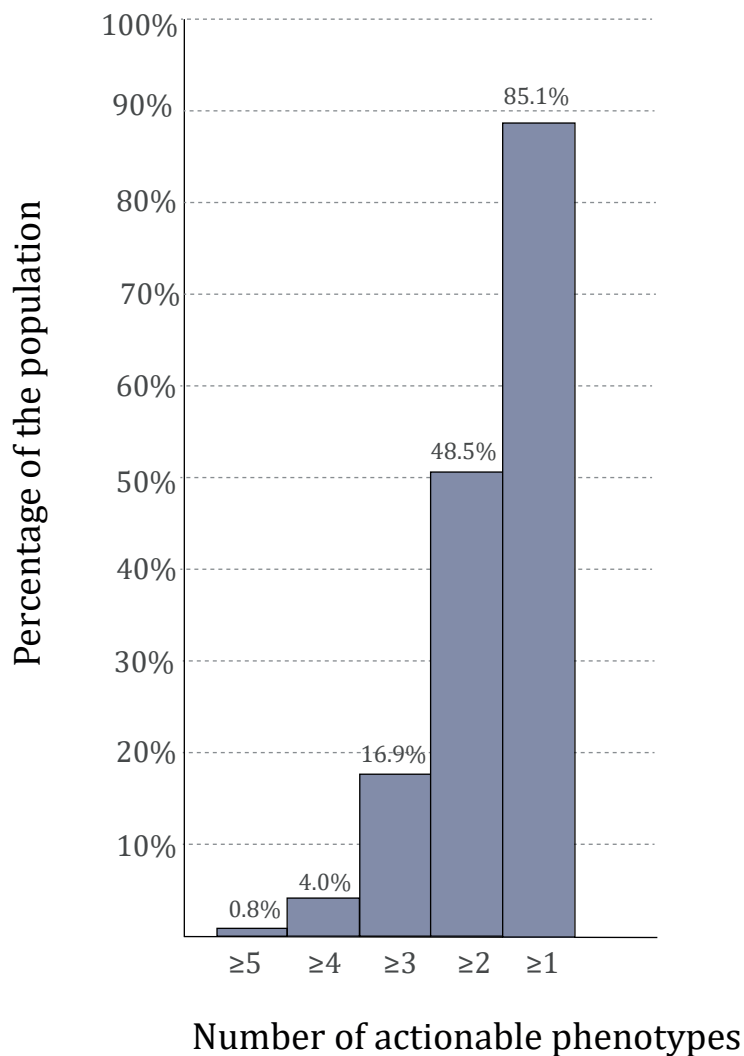

**Figure S3: Total number of actionable phenotypes per individual based on CPIC guidelines.** Actionable is classified as: any phenotype with a dosing advice available in the CPIC guidelines. An unknown phenotype is categorized as not actionable. Results are based on all genotypes with sufficient coverage (haplotype quality > 20). Due to an inability to call copy number variants, only CYP2D6 diplotypes consisting of 2 null-alleles were phenotyped (PM), no phenotype was assigned for other phenotypes classifying them as unknown.
