# Supplementary material for: Repurposing of Diagnostic Whole Exome Sequencing Data of 1,583 Individuals for Clinical Pharmacogenetics
Source: PubMed Central journal article supplement — Clin Pharmacol Ther. 2019 Nov 21;107(3):617–27. doi: 10.1002/cpt.1665 (PMC7027978; doi:10.1002/cpt.1665), 2019-11-21
Supplement: CPT-107-617-s004.pdf [file CPT-107-617-s004.pdf]

A

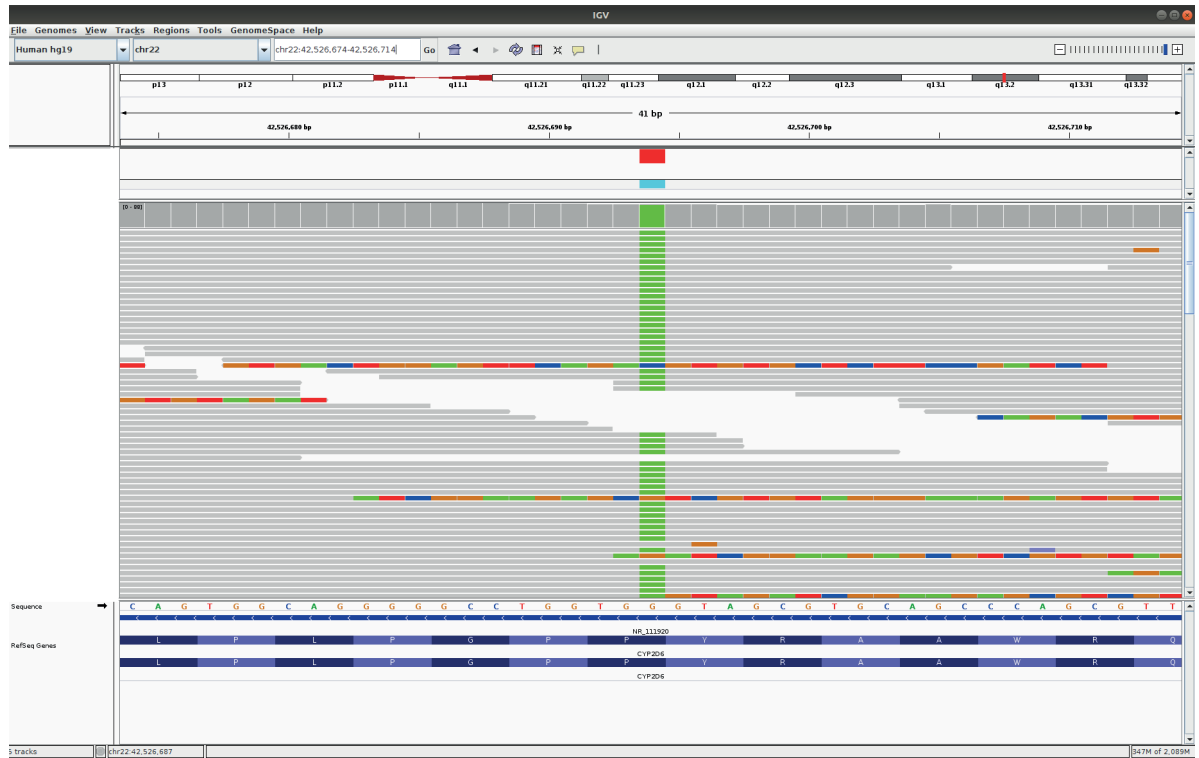

B

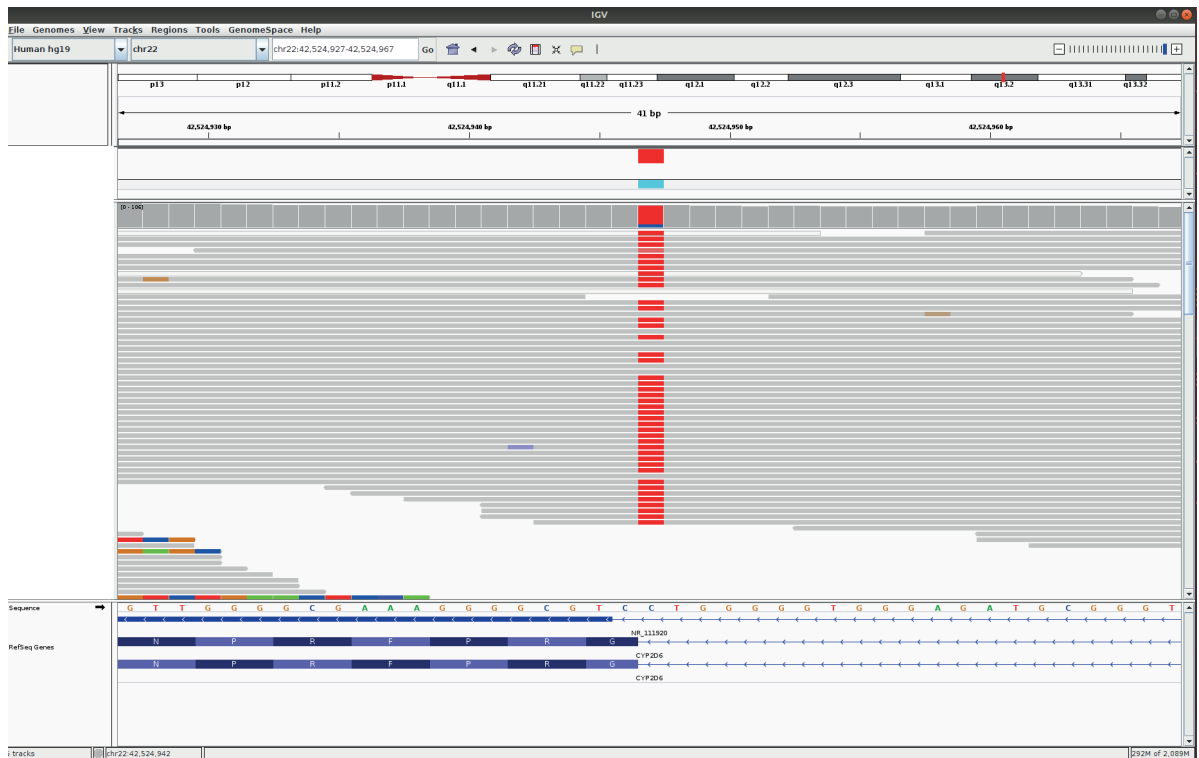

**Figure S4: Readpile of individual for whom the CYP2D6 call is discrepant between Pharmacoscan (\*4/\*4) and WES data (\*4/\*10).**

**A.** g. 42526694G>A, which is homozygous mutant, is found in both the CYP2D6 \*4 and the CYP2D6\*10 allele

**B.** g.42524947C>T for which the mutation is observed in 87% of all reads, is only found in the CYP2D6\*4 allele
