# Supplementary material for: Repurposing of Diagnostic Whole Exome Sequencing Data of 1,583 Individuals for Clinical Pharmacogenetics
Source: PubMed Central journal article supplement — Clin Pharmacol Ther. 2019 Nov 21;107(3):617–27. doi: 10.1002/cpt.1665 (PMC7027978; doi:10.1002/cpt.1665), 2019-11-21
Supplement: CPT-107-617-s005.pdf [file CPT-107-617-s005.pdf]

**Table S1: Genes and variants included in the panel.** Inclusion is based on the panel developed by the U-PGx consortium.

| Gene    | Star-allele | RS-number                | HGVS (GRCh37)                                             |
|---------|-------------|--------------------------|-----------------------------------------------------------|
| CYP2B6  | *4          | rs2279343                | NC_000019.9:g.41515263A>G                                 |
|         | *18         | rs28399499               | NC_000019.9:g.41518221T>C                                 |
|         | *9          | rs3745274                | NC_000019.9:g.41512841G>T                                 |
|         | *16         | rs2279343;<br>rs28399499 | NC_000019.9:g.41515263A>G;<br>NC_000019.9:g.41518221T>C   |
|         | *6          | rs2279343;<br>rs3745274  | NC_000019.9:g.41515263A>G;<br>NC_000019.9:g.41512841G>T   |
| CYP2C19 | *17         | rs12248560               | NC_000010.10:g.96521657C>T                                |
|         | *9          | rs17884712               | NC_000010.10:g.96535246G>A                                |
|         | *4A/B       | rs28399504               | NC_000010.10:g.96522463A>G                                |
|         | *8          | rs41291556               | NC_000010.10:g.96535173T>C                                |
|         | *2          | rs4244285                | NC_000010.10:g.96541616G>A                                |
|         | *3          | rs4986893                | NC_000010.10:g.96540410G>A                                |
|         | *5          | rs56337013               | NC_000010.10:g.96612495C>T                                |
|         | *10         | rs6413438                | NC_000010.10:g.96541615C>T                                |
|         | *6          | rs72552267               | NC_000010.10:g.96535210G>A                                |
| CYP2C9  | *3          | rs1057910                | NC_000010.10:g.96741053A>C                                |
|         | *2          | rs1799853                | NC_000010.10:g.96702047C>T                                |
|         | *11         | rs28371685               | NC_000010.10:g.96740981C>T                                |
|         | *5          | rs28371686               | NC_000010.10:g.96741058C>G                                |
| CYP2D6  | *10         | rs1065852                | NC_000022.10:g.42526694G>A                                |
|         | *17         | rs28371706               | NC_000022.10:g.42525772G>A                                |
|         | *41         | rs28371725               | NC_000022.10:g.42523805C>T                                |
|         | *3          | rs35742686               | NC_000022.10:g.42524244delT                               |
|         | *4          | rs3892097;<br>rs1065852  | NC_000022.10:g.42524947C>T;<br>NC_000022.10:g.42526694G>A |
|         | *6          | rs5030655                | NC_000022.10:g.42525086delA                               |
|         | *9          | rs5030656                | NC_000022.10:g.42524176_42524178delCTT                    |
|         | *8          | rs5030865                | NC_000022.10:g.42525035C>A                                |
|         | *14B        | rs5030865                | NC_000022.10:g.42525035C>T                                |
|         | *14A        | rs5030865;<br>rs1065852  | NC_000022.10:g.42525035C>T;<br>NC_000022.10:g.42526694G>A |
| CYP3A5  | *6          | rs10264272               | NC_000007.13:g.99262835C>T                                |
|         | *7          | rs41303343               | NC_000007.13:g.99250393_99250394insA                      |
|         | *3          | rs776746                 | NC_000007.13:g.99270539C>T                                |
| DPYD    | *2          | rs3918290                | NC_000001.10:g.97915614C>T                                |
|         | *13         | rs55886062               | NC_000001.10:g.97981343A>C                                |
|         | 1236G>A     | rs56038477               | NC_000001.10:g.98039419C>T                                |
|         | 2846A>T     | rs67376798               | NC_000001.10:g.97547947T>A                                |
| F5L     | FvL         | rs6025                   | NC_000001.10:g.169519049T>C                               |
| SLCO1B1 | *5          | rs4149056                | NC_000012.11:g.21331549T>C                                |
| TPMT    | *3A         | rs1142345;<br>rs1800460  | NC_000006.11:g.18130918T>C;<br>NC_000006.11:g.18139228C>T |
|         | *3C         | rs1142345                | NC_000006.11:g.18130918T>C                                |
|         | *3B         | rs1800460                | NC_000006.11:g.18139228C>T                                |
|         | *2          | rs1800462                | NC_000006.11:g.18143955C>G                                |
|         | UGT1A1      | *27                      | rs35350960                                                |
| *6      |             | rs4148323                | NC_000002.11:g.234669144G>A                               |
| *36     |             | rs8175347[5]             | NC_000002.11:g.234668881_234668882TA[5]                   |
| *28     |             | rs8175347[7]             | NC_000002.11:g.234668881_234668882TA[7]                   |
| *37     |             | rs8175347[8]             | NC_000002.11:g.234668881_234668882TA[8]                   |
| VKORC1  | 1173        | rs9934438                | NC_000016.9:g.31104878G>A                                 |

**Table S2:** Haplotype frequencies of the prospective cohort. There were no significant differences in haplotype frequencies between the parents and children ( $\chi^2$ ,  $p < 0.001$ ) with the exception of VKORC1 ( $p = 0.48$ ).

| Gene    | Haplotype assignment | Parents only (prospective) |           | Children only (prospective) |           |
|---------|----------------------|----------------------------|-----------|-----------------------------|-----------|
|         |                      | N                          | Frequency | N                           | Frequency |
| CYP2B6  |                      | 226                        |           | 110                         |           |
|         | *1                   | 165                        | 73.0%     | 86                          | 78.2%     |
|         | *4                   | 13                         | 5.8%      | 3                           | 2.7%      |
|         | *6                   | 46                         | 20.4%     | 21                          | 19.1%     |
|         | *9                   | 2                          | 0.88%     |                             |           |
| CYP2C19 |                      | 0                          |           | 0                           |           |
| CYP2C9  |                      | 226                        |           | 110                         |           |
|         | *1                   | 189                        | 83.6%     | 94                          | 85.5%     |
|         | *2                   | 25                         | 11.1%     | 11                          | 10%       |
|         | *3                   | 12                         | 5.3%      | 5                           | 4.5%      |
| CYP2D6  |                      | 224                        |           | 110                         |           |
|         | *1                   | 129                        | 57.6%     | 57                          | 51.8%     |
|         | *10                  | 10                         | 4.5%      | 5                           | 4.5%      |
|         | *3                   | 8                          | 3.6%      | 2                           | 1.8%      |
|         | *4                   | 41                         | 18.3%     | 26                          | 23.6%     |
|         | *41                  | 23                         | 10.3%     | 12                          | 10.9%     |
|         | *6                   | 2                          | 0.9%      | 1                           | 0.9%      |
|         | *9                   | 11                         | 4.9%      | 7                           | 6.4%      |
| CYP3A5  |                      | 192                        |           | 88                          |           |
|         | *1                   | 9                          | 4.7%      | 5                           | 5.7%      |
|         | *3                   | 181                        | 94.3%     | 82                          | 93.2%     |
|         | *6                   | 2                          | 1.0%      | 1                           | 1.1%      |
| DPYD    |                      | 226                        |           | 110                         |           |
|         | *1                   | 217                        | 96.0%     | 106                         | 96.4%     |
|         | *2A                  | 2                          | 0.88%     | 1                           | 0.91%     |
|         | 1236G>A              | 6                          | 2.7%      | 3                           | 2.7%      |
|         | 2846A>T              | 1                          | 0.44%     | 0                           |           |
| FVL     |                      | 226                        |           | 110                         |           |
|         | F5 positive          | 7                          | 3.1%      | 3                           | 2.7%      |
|         | F5 negative          | 219                        | 96.9%     | 107                         | 97.3%     |
| SLCO1B1 |                      | 226                        |           | 110                         |           |
|         | *5                   | 31                         | 13.7%     | 18                          | 16.4%     |
|         | wt                   | 195                        | 86.3%     | 92                          | 83.6%     |
| TPMT    |                      | 224                        |           | 106                         |           |
|         | *3A                  | 11                         | 4.9%      | 5                           | 4.7%      |
|         | wt                   |                            |           | 1                           | 0.94%     |
|         |                      | 213                        | 95.1%     | 100                         | 94.3%     |
| VKORC1  |                      | 226                        |           | 106                         |           |
|         | 1173T                | 93                         | 41.2%     | 48                          | 45.3%     |
|         | wt                   | 133                        | 58.8%     | 58                          | 54.7%     |

**Table S3: Manually assigned diplotype for calls that could not be phased automatically.** Diplotype assignments are based on linkage and adapted from the Ubiquitous pharmacogenomics consortium translation tables.

| Gene   | Assigned diplotype | Variant on allele A         | Variant on Allele B         | Unphased variants                           | Frequency |
|--------|--------------------|-----------------------------|-----------------------------|---------------------------------------------|-----------|
| CYP2B6 | *1/*6              | -                           | -                           | 41515263A>G;<br>41512841G>T                 | 81        |
|        | *1/*6              | -                           | 41515263A>G                 | 41512841G>T                                 | 3         |
|        | *1/*6              | -                           | 41512841G>T                 | 41515263A>G                                 | 7         |
|        | *1/*6              | 41515263A>G                 | -                           | 41512841G>T                                 | 8         |
|        | *4/*6              | 41515263A>G                 | 41515263A>G                 | 41512841G>T                                 | 3         |
|        | *6/*9              | 41512841G>T                 | 41512841G>T                 | 41515263A>G                                 | 1         |
| CYP2C9 | *2/*3              | -                           | 96741053A>C                 | 96702047C>T                                 | 2         |
| CYP2D6 | *4/*1              | 42526694G>A                 | -                           | 42524947C>T                                 | 2         |
|        | *4/*1              | 42524947C>T                 | -                           | 42526694G>A                                 | 2         |
|        | *4/*3              | 42524947C>T;<br>42526694G>A | -                           | 42524244delT                                | 1         |
|        | *3/*4              | -                           | 42526694G>A;<br>42524947C>T | 42524244delT                                | 1         |
|        | *9/*4              | 42524178_<br>42524180delTCT | -                           | 42526694G>A;<br>42524947C>T                 | 1         |
|        | *41/*4             | 42523805C>T                 | -                           | 42526694G>A;<br>42524947C>T                 | 2         |
|        | *41/*4             | -                           | 42526694G>A;<br>42524947C>T | 42523805C>T                                 | 1         |
|        | *1/*4              | -                           | 42524947C>T                 | 42526694G>A                                 | 2         |
|        | *1/*4              | -                           | 42526694G>A                 | 42524947C>T                                 | 1         |
|        | *41/*4             | 42523805C>T                 | 42524947C>T                 | 42526694G>A                                 | 1         |
|        | *4/*41             | -                           | -                           | 42526694G>A;<br>42523805C>T;<br>42524947C>T | 2         |
|        | *4/*41             | -                           | 42523805C>T                 | 42526694G>A;<br>42524947C>T                 | 3         |
|        | *10/*41            | -                           | 42523805C>T                 | 42526694G>A                                 | 1         |
|        | *10/*41            | 42526694G>A                 | -                           | 42523805C>T                                 | 2         |
|        | *4/*41             | -                           | -                           | 42523805C>T;<br>42526694G>A;<br>42524947C>T | 1         |
|        | *9/*41             | 42524178_<br>42524180delTCT | -                           | 42523805C>T                                 | 1         |
|        | *4/*9              | -                           | 42524178_<br>42524180delTCT | 42526694G>A;<br>42524947C>T                 | 1         |
|        | *17/*41            | 42523805C>T                 | -                           | 42525772G>A                                 | 1         |
|        | *17/*41            | -                           | 42523805C>T                 | 42525772G>A                                 | 1         |
|        | *41/*9             | -                           | 42524178_<br>42524180delTCT | 42523805C>T                                 | 1         |
| CYP3A5 | *3/*7              | -                           | 99250394_<br>99250395insA   | 99270539C>T                                 | 1         |
| TPMT   | wt/*3A             | -                           | -                           | 18130918T>C;<br>18139228C>T                 | 18        |

**Table S4: Phenotype frequencies and actionability based on CPIC guidelines.** Phenotypes are based on the U-PGx translation tables, actionability is based on the Clinical Pharmacogenomics implementation consortium (CPIC) guidelines, where actionable is defined as a phenotype accompanied by at least one dosing advise. Guidelines for Factor V Leiden are not available.

| Gene    | Phenotype                   | Number of subjects | Frequency | Actionable |
|---------|-----------------------------|--------------------|-----------|------------|
| CYP2B6  |                             | 1577               |           |            |
|         | PM                          | 105                | 6.7%      | Yes        |
|         | IM                          | 528                | 33.5%     | Yes        |
|         | EM                          | 944                | 59.9%     |            |
| CYP2C19 |                             | 15                 |           |            |
|         | PM                          | -                  |           | Yes        |
|         | IM                          | 4                  | 26.7%     | Yes        |
|         | EM                          | 7                  | 46.7%     |            |
|         | RM                          | 4                  | 26.7%     | Yes        |
|         | UM                          | -                  |           | Yes        |
| CYP2C9  |                             | 1583               |           |            |
|         | PM                          | 59                 | 3.7%      | Yes        |
|         | IM                          | 487                | 30.2%     | Yes        |
|         | EM                          | 1037               | 65.5%     |            |
| CYP2D6  |                             | 1576               |           |            |
|         | PM*                         | 66                 | 4.2%      | Yes        |
|         | Not assigned                | 1510               | 95.8%     |            |
| CYP3A5  |                             | 1163               |           |            |
|         | PM                          | 882                | 75.8%     |            |
|         | IM                          | 263                | 22.6%     | Yes        |
|         | EM                          | 18                 | 1.5%      | Yes        |
| DPYD    |                             | 1581               |           |            |
|         | AS: 0                       | -                  |           | Yes        |
|         | AS: 0.5                     | -                  |           | Yes        |
|         | AS: 1                       | 21                 | 1.3%      | Yes        |
|         | AS: 1.5                     | 95                 | 6.0%      | Yes        |
|         | AS: 2                       | 1465               | 92.7%     |            |
| SLCO1B1 |                             | 1579               |           |            |
|         | Normal Function             | 1172               | 74.2%     |            |
|         | Decreased function          | 371                | 23.5%     | Yes        |
|         | Poor function               | 36                 | 2.3%      | Yes        |
| TPMT    |                             | 1562               |           |            |
|         | PM                          | 1                  | 0.1%      | Yes        |
|         | IM                          | 139                | 8.9%      | Yes        |
|         | EM                          | 1421               | 91.0%     |            |
| VKORC1  |                             | 1549               |           |            |
|         | Normal Function (1173CC)    | 564                | 36.4%     |            |
|         | Decreased Function (1173CT) | 723                | 46.7%     |            |
|         | Poor Function (1173TT)      | 262                | 16.9%     | Yes        |

PM: Poor metabolizer, IM: Intermediate Metabolizer, EM: Extensive Metabolizer, RM: Rapid Metabolizer, UM: ultra-rapid Metabolizer, AS: Activity Score, \* Based on Single Nucleotide Variants (2 null-alleles), as Copy Number variants could not be determined.
